# Supplementary material for: Nucleopore Traffic Is Hindered by SARS-CoV-2 ORF6 Protein to Efficiently Suppress IFN-β and IL-6 Secretion
Source: MDPI journal article supplement (doi:10.3390/v14061273), 2022-06-11
Supplement: s1 [file s1]

## Nucleopore traffic is hindered by SARS-CoV-2 ORF6 protein to efficiently suppress IFN- $\beta$ and IL-6 secretion

Gianni Gori Savellini <sup>1\*</sup>, Gabriele Anichini <sup>1</sup>, Claudia Gandolfo <sup>1</sup>, Chiara Terrosi <sup>1</sup>, Maria Grazia Cusi

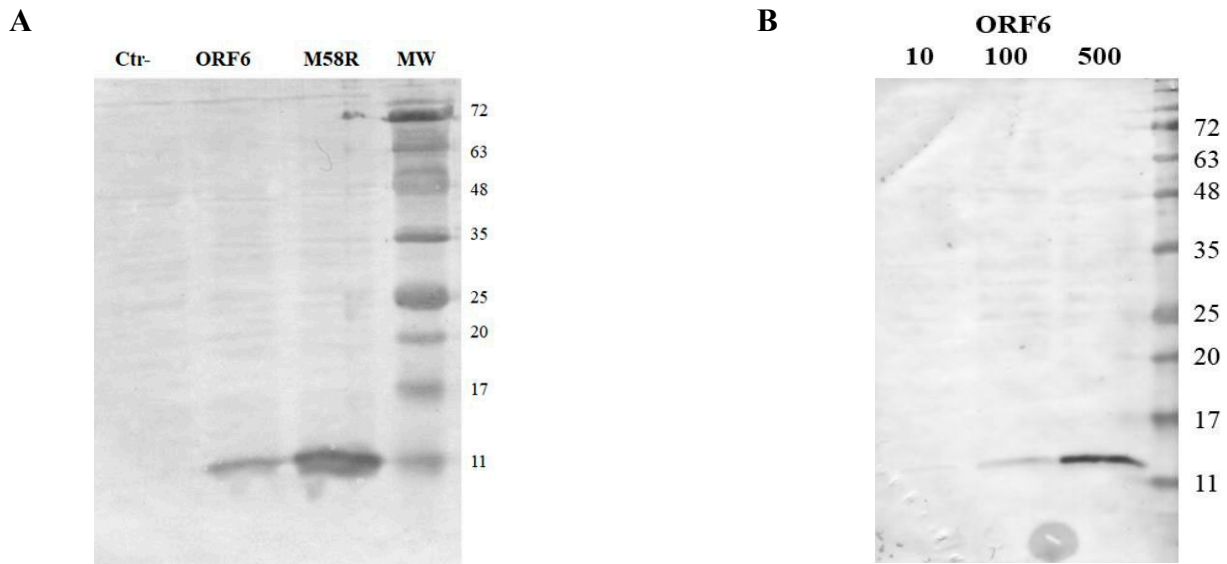

**Figure S1. Inhibitory activity of SARS-COV-2 ORF6 protein.**

HEK-293T cells were co-transfected with the IFN- $\beta$  promoter-mediated Firefly luciferase (pIFN- $\beta$ ) and the SV40 promoter-mediated *Renilla* luciferase reporter plasmids, with (A) ORF6 or the mutant M58R expressing plasmids or with empty vector (Ctr-) or (B) increasing amounts of ORF6 expressing plasmid. At 48h post-transfection, cells were collected for reporter assay and 25  $\mu$ g of total proteins were resolved by SDS-PAGE followed by immunostaining with anti-HA monoclonal antibody to confirm ORF6 protein variants expression. MW: molecular weight. The immunoblotting image is representative of experiments performed at least three times.

**A**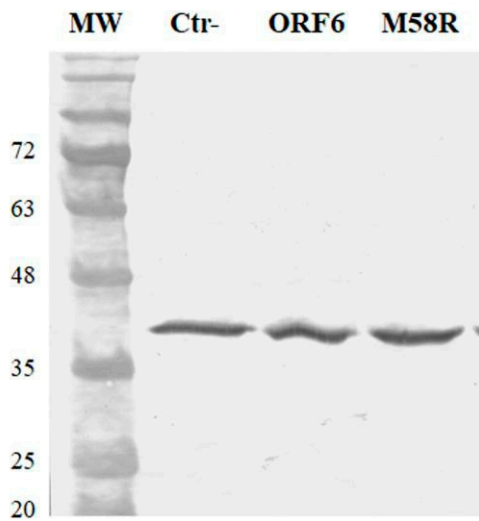**B**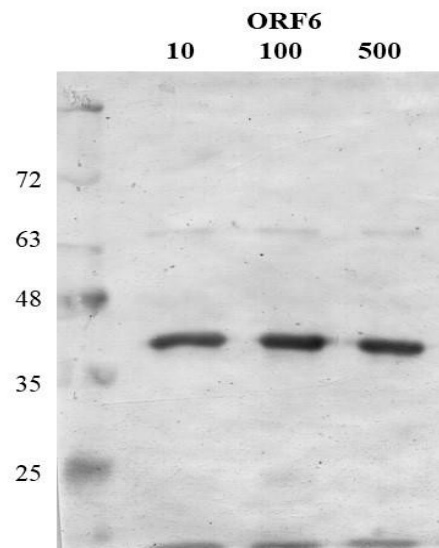

**Figure S1a. Inhibitory activity of SARS-COV-2 ORF6 protein.**

HEK-293T cells were co-transfected with the IFN- $\beta$  promoter-mediated Firefly luciferase (pIFN- $\beta$ ) and the SV40 promoter-mediated *Renilla* luciferase reporter plasmids, with (A) ORF6 or the mutant M58R expressing plasmids or with empty vector (Ctr-) and (B) with increasing amounts of ORF6 expressing plasmid. At 48h post-transfection, cells were collected for reporter assay and 25  $\mu$ g of total proteins were resolved by SDS-PAGE followed by immunostaining with anti-actin monoclonal antibody as loading control. MW: molecular weight. The immunoblotting image is representative of experiments performed at least three times.

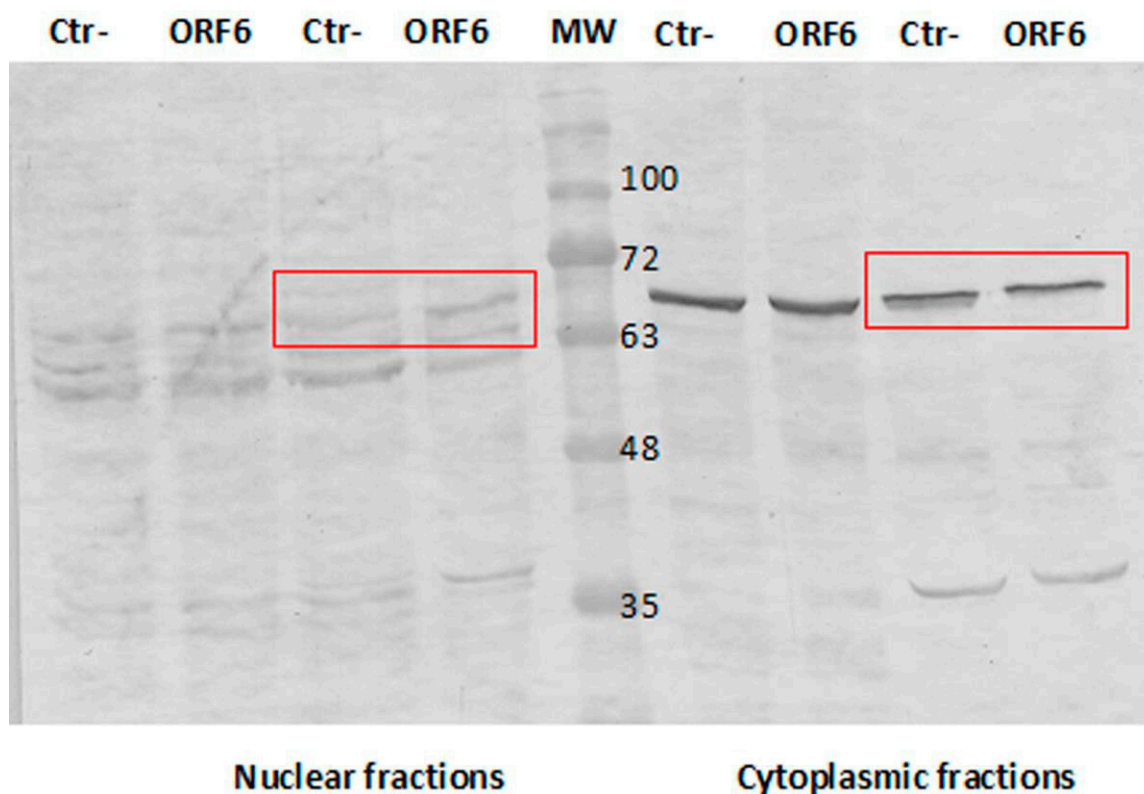

**Figure S3b. NF- $\kappa$ B activity is affected by ORF6 protein activity.**

NF- $\kappa$ B nuclear translocation was evaluated in empty vector (Ctr-) or ORF6 expressing A549 cells. Cellular fractionation was performed as described in the material and methods section and equal amounts (25  $\mu$ g) of proteins were resolved by denaturing polyacrylamide gel. NF- $\kappa$ B movement into the nucleus (left side) or retained in the cell cytoplasm (right side) was evaluated by probing the samples with a specific antibody. MW: molecular weight. The immunoblotting image is representative of experiments performed at least three times.

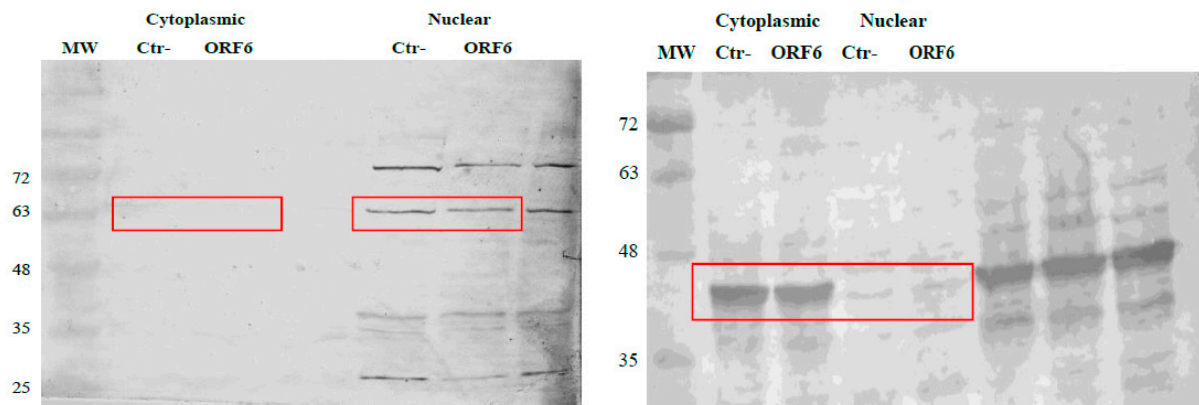

**Figure S3b. NF- $\kappa$ B activity is affected by ORF6 protein activity.**

Cellular fractionation was performed on empty vector (Ctr-) or ORF6 expressing A549 cells as described in the material and methods section. Equal amounts of nuclear or cytoplasmic proteins (25  $\mu$ g) were resolved by denaturing polyacrylamide gel and immunoblotting for Lamin B1 (left panel) or actin (right panel) detection was performed to validate the experimental procedure. MW: molecular weight. The reported image is representative of at least three experiments.

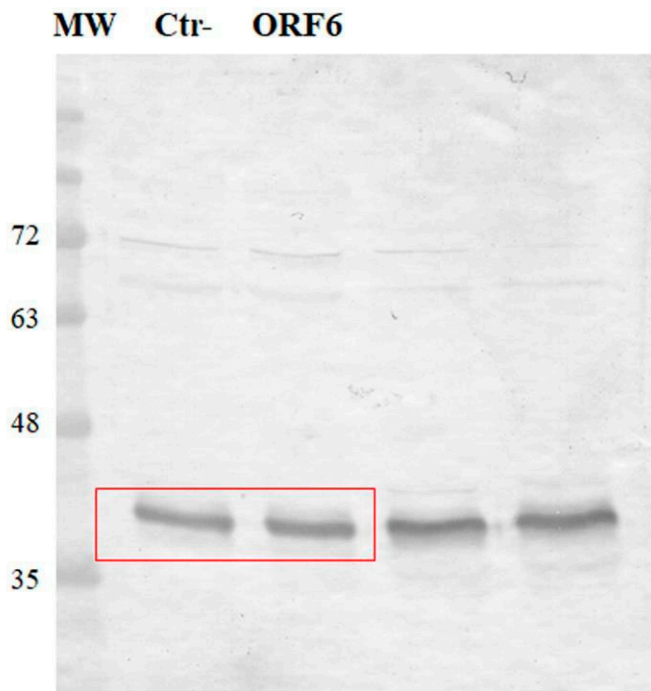

**Figure S3b. NF- $\kappa$ B activity is affected by ORF6 protein activity.**

Cellular fractionation was performed on empty vector (Ctr-) or ORF6 expressing A549 cells as described in the material and methods section. Equal amounts of cytoplasmic proteins (25  $\mu$ g) were resolved by denaturing polyacrylamide gel and actin was probed as loading control for further experiments. MW: molecular weight. The reported image is representative of at least three experiments.

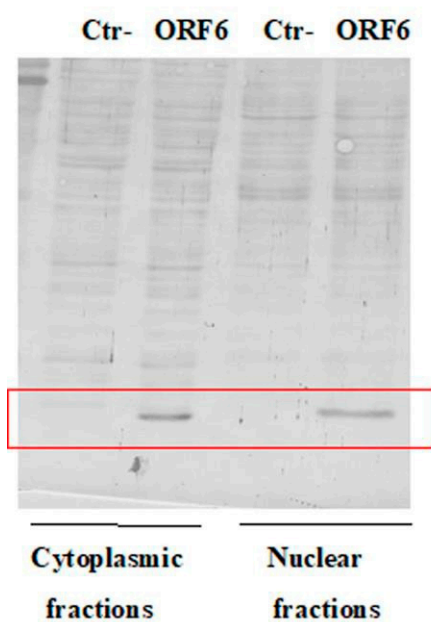

**Figure S3b. NF- $\kappa$ B activity is affected by ORF6 protein activity.**

Cellular fractionation was performed on empty vector (Ctr-) or ORF6 expressing A549 cells as described in the material and methods section. Equal amounts of cytoplasmic or nuclear proteins (25  $\mu$ g) were resolved by denaturing polyacrylamide gel and ORF6 subcellular localization was assessed by anti-HA epitope tag antibody staining. MW: molecular weight. The reported image is representative of at least three experiments.
