# Supplementary material for: Nucleopore Traffic Is Hindered by SARS-CoV-2 ORF6 Protein to Efficiently Suppress IFN-β and IL-6 Secretion
Source: Viruses. 2022 Jun 11;14(6):1273. doi: 10.3390/v14061273 (PMC9230033; doi:10.3390/v14061273)
Supplement: Supplementary file 1 [file viruses-14-01273-s001.zip › Supplement dataset.xlsx]

## Sheet: Fig 1
	Fig. 1a														Fig. 1b										Fig. 1d
		pIFN-Luc						pSV40-RL								pIFN-Luc				pSV40-RL						Ctr-	ORF6-10 ng	ORF6-500 ng	ORF3-500 ng
		Ctr-	ORF6	M58R	Ctr- + polyIC	ORF6 + polyIC	M58R + polyIC	Ctr-	ORF6	M58R	Ctr- + polyIC	ORF6 + polyIC	M58R + polyIC			Ctr-	ORF6-10	ORF6-100	ORF6-500	Ctr-	ORF6-10	ORF6-100	ORF6-500			1	1.58389	2.23848	1.35714
		503544	53176	358235	1655904	29527	922668	818120	42060	642020	496976	51692	718912			596567	331297	197011	77550	1169008	363769	154626	19926			1	1.4382	1.96457	1.19107
		262590	33198	330116	1574264	24904	606020	886438	36799	633648	538476	88015	764028			330650	187740	111530	33198	818120	290585	291304	36799			1	1.53077	2.1488	1.075
		253781	29277	302868	1101908	25782	601280	998547	42256	675668	606578	58054	649608			503544	390050	127634	29277	998547	317153	281236	42256
																									Mean	1	1.51762	2.11729	1.20774
																									SD	0	0.0737277	0.139647	0.141805
	Mean	339972	38550.3	330406	1.44403e+06	26737.7	709989	901035	40371.7	650445	547343	65920.3	710849		Mean	476920	303029	145392	46675	995225	323836	242389	32993.7			n=3	n=3	n=3	n=3
	SD	141726	12817	27684.6	299081	2455.2	184200	91094.9	3095.57	22240.9	55336.4	19397.2	57634.5		SD	134943	104075	45423	26810.3	175468	37046.8	76171.2	11641.2
		n=3	n=3	n=3	n=3	n=3	n=3	n=3	n=3	n=3	n=3	n=3	n=3			n=3	n=3	n=3	n=3	n=3	n=3	n=3	n=3
	Fig- 1c
		Ctr-	ORF6-10	ORF6-500	M58R-10	M58R-500	GFP
		100	90.4481	70.2128	91.7453	80.6604	90.4481
		100	92.7472	70.6593	88.022	81.8681	94.2857
		100	83.7798	66.9725	87.156	81.078	79.3532
	Mean	100	88.9917	69.2815	88.9744	81.2022	88.029
	SD	0	4.65773	2.01212	2.4384	0.613377	7.75461
		n=3	n=3	n=3	n=3	n=3	n=3

## Sheet: Fig 1 statistic
	Fig. 1a						Fig. 1b					Fig. 1c
	FF Ctr- vs. ORF6		FF Ctr- vs. M58R	FF Ctr- vs. ORF6 polyIC	FF Ctr- vs. M58R polyIC			FF ORF6-10	FF ORF6-100	FF ORF6-500			ORF6-10	ORF6-500	M58R-10	M58R-500	GFP
	P value	0.0214	0.9142	0.0001	0.0239		P value	0.1519	0.0157	0.0056		P value	0.0149	<0,0001	0.0014	<0,0001	0.0556
	P value summary	*	ns	***	*		P value summary	ns	*	**		P value summary	*	****	**	****	ns
	Significantly different (P < 0.05)?	Yes	No	Yes	Yes		Significantly different? (P < 0.05)	No	Yes	Yes		Significantly different? (P < 0.05)	Yes	Yes	Yes	Yes	No
	One- or two-tailed P value?	Two-tailed	Two-tailed	Two-tailed	Two-tailed		One- or two-tailed P value?	Two-tailed	Two-tailed	Two-tailed		One- or two-tailed P value?	Two-tailed	Two-tailed	Two-tailed	Two-tailed	Two-tailed
	t, df	t=3,669 df=4	t=0,1147 df=4	t=14,22 df=4	t=3,544 df=4		t, df	t=1,767 df=4	t=4,033 df=4	t=5,417 df=4		t, df	t=4,094 df=4	t=26,44 df=4	t=7,832 df=4	t=53,08 df=4	t=2,674 df=4
	How big is the difference?						How big is the difference?					How big is the difference?
	Mean ± SEM of column A	339972 ± 81826, n=3	339972 ± 81826, n=3	547343 ± 31949, n=3	547343 ± 31949, n=3		Mean ± SEM of column K	476920 ± 77909, n=3	476920 ± 77909, n=3	476920 ± 77909, n=3		Mean ± SEM of column K	100 ± 0, n=3	100 ± 0, n=3	100 ± 0, n=3	100 ± 0, n=3	100 ± 0, n=3
	Mean ± SEM of column B	38550 ± 7400, n=3	330406 ± 15984, n=3	65920 ± 11199, n=3	710849 ± 33275, n=3		Mean ± SEM of column L	303029 ± 60088, n=3	145392 ± 26225, n=3	46675 ± 15479, n=3		Mean ± SEM of column L	88,99 ± 2,689, n=3	69,28 ± 1,162, n=3	88,97 ± 1,408, n=3	81,2 ± 0,3541, n=3	88,03 ± 4,477, n=3
	Difference between means	-301421 ± 82160	-9565 ± 83372	-481423 ± 33854	163506 ± 46130		Difference between means	-173891 ± 98389	-331529 ± 82205	-430245 ± 79432		Difference between means	-11,01 ± 2,689	-30,72 ± 1,162	-11,03 ± 1,408	-18,8 ± 0,3541	-11,97 ± 4,477
	95% confidence interval	-529533 to -73310	-241044 to 221913	-575418 to -387428	35429 to 291583		95% confidence interval	-447063 to 99280	-559765 to -103292	-650784 to -209706		95% confidence interval	-18,47 to -3,542	-33,94 to -27,49	-14,93 to -7,117	-19,78 to -17,81	-24,4 to 0,4595
	R squared (eta squared)	0.7709	0.00328	0.9806	0.7585		R squared	0.4385	0.8026	0.88		R squared	0.8073	0.9943	0.9388	0.9986	0.6412
	F test to compare variances						F test to compare variances					F test to compare variances
	F, DFn, Dfd	122,3, 2, 2	26,21, 2, 2	8,139, 2, 2	1,085, 2, 2		F,DFn, Dfd	1,681, 2, 2	8,826, 2, 2	25,33, 2, 2		F,DFn, Dfd	Infinity, 2, 2	Infinity, 2, 2	Infinity, 2, 2	Infinity, 2, 2	Infinity, 2, 2
	P value	0.0162	0.0735	0.2189	0.9593		P value	0.7459	0.2035	0.0759		P value	<0,0001	<0,0001	<0,0001	<0,0001	<0,0001
	P value summary	*	ns	ns	ns		P value summary	ns	ns	ns		P value summary	****	****	****	****	****
	Significantly different (P < 0.05)?	Yes	No	No	No		Significantly different? (P < 0.05)	No	No	No		Significantly different? (P < 0.05)	Yes	Yes	Yes	Yes	Yes
	Fig. 1a						Fig. 1b
	RL Ctr- vs. ORF6		RL Ctr- vs. M58R	RL Ctr- vs. ORF6 polyIC	RL Ctr- vs. M58R polyIC			RL ORF6-10	RL ORF6-100	RL ORF6-500
	P value	<0,0001	0.0098	0.0001	0.0239		P value	0.0029	0.0024	0.0007
	P value summary	****	**	***	*		P value summary	**	**	***
	Significantly different (P < 0.05)?	Yes	Yes	Yes	Yes		Significantly different? (P < 0.05)	Yes	Yes	Yes
	One- or two-tailed P value?	Two-tailed	Two-tailed	Two-tailed	Two-tailed		One- or two-tailed P value?	Two-tailed	Two-tailed	Two-tailed
	t, df	t=16,35 df=4	t=4,629 df=4	t=14,22 df=4	t=3,544 df=4		t, df	t=6,484 df=4	t=6,817 df=4	t=9,477 df=4
	How big is the difference?						How big is the difference?
	Mean ± SEM of column G	901035 ± 52594, n=3	901035 ± 52594, n=3	547343 ± 31949, n=3	547343 ± 31949, n=3		Mean ± SEM of column N	995225 ± 101306, n=3	995225 ± 101306, n=3	995225 ± 101306, n=3
	Mean ± SEM of column H	40372 ± 1787, n=3	650445 ± 12841, n=3	65920 ± 11199, n=3	710849 ± 33275, n=3		Mean ± SEM of column O	323836 ± 21389, n=3	242389 ± 43977, n=3	32994 ± 6721, n=3
	Difference between means	-860663 ± 52624	-250590 ± 54139	-481423 ± 33854	163506 ± 46130		Difference between means	-671389 ± 103540	-752836 ± 110440	-962231 ± 101529
	95% confidence interval	-1006771 to -714556	-400902 to -100277	-575418 to -387428	35429 to 291583		95% confidence interval	-958861 to -383917	-1059467 to -446206	-1244121 to -680342
	R squared (eta squared)	0.9853	0.8427	0.9806	0.7585		R squared	0.9131	0.9207	0.9574
	F test to compare variances						F test to compare variances
	F, DFn, Dfd	866, 2, 2	16,78, 2, 2	8,139, 2, 2	1,085, 2, 2		F,DFn, Dfd	22,43, 2, 2	5,307, 2, 2	227,2, 2, 2
	P value	0.0023	0.1125	0.2189	0.9593		P value	0.0853	0.3171	0.0088
	P value summary	**	ns	ns	ns		P value summary	ns	ns	**
	Significantly different (P < 0.05)?	Yes	No	No	No		Significantly different? (P < 0.05)	No	No	Yes

## Sheet: Fig 2
	Fig. 2a - HEK-293T										Fig. 2b - HEK-293T
		pIL6-Luc				pSV40-RL						pIL10-Luc		pSV40-RL
		Ctr-	ORF6	M58R	GFP	Ctr-	ORF6	M58R	GFP			Ctr-	ORF6	Ctr-	ORF6
		42352	125848	102540	48584	186080	46692	802808	139332			20406	8301	766805	38652
		49416	155404	121772	68952	174486	49604	520680	231810			25351	5462	966377	25066
		48584	123492	106884	60886	219165	39648	578060	325264			19567	6283	592880	30510
	Mean	46784	134915	110399	59474	193244	45314.7	633849	232135		Mean	21774.7	6682	775354	31409.3
	SD	3860.7	17783.3	10086.2	10257.2	23184.9	5118.91	149109	92966.4		SD	3125.48	1460.95	186895	6837.5
		n=3	n=3	n=3	n=3	n=3	n=3	n=3	n=3			n=3	n=3	n=3	n=3
	Fig. 2a - A549										Fig. 2b - A549
		pIL6-Luc				pSV40-RL						pIL10-Luc		pSV40-RL
		Ctr-	ORF6	M58R	GFP	Ctr-	ORF6	M58R	GFP			Ctr-	ORF6	Ctr-	ORF6
		1047	1479	954	1022	17882	6597	20926	11521			1160	1390	13103	10846
		1261	1765	886	1072	12657	5843	15203	10732			1266	1593	11562	8734
		1165	1623	772	840	15448	5463	11561	18292			985	1096	10552	9570
	Mean	1157.67	1622.33	870.667	978	15329	5967.67	15896.7	13515		Mean	1137	1359.67	11739	9716.67
	SD	107.188	143.001	91.9638	122.098	2614.53	577.187	4720.88	4155.77		SD	141.905	249.885	1284.68	1063.61
		n=3	n=3	n=3	n=3	n=3	n=3	n=3	n=3			n=3	n=3	n=3	n=3

## Sheet: Fig 2 statistic
	Fig. 2a					Fig. 2a					Fig. 2b			Fig. 2b
	FF IL6 HEK-293T	ORF6	M58R	GFP		FF IL6 A549	ORF6	M58R	GFP		FF IL10			FF IL10
	P value	0.0011	0.0005	0.1154		P value	0.0108	0.0245	0.128		P value	0.0016		P value	0.2507
	P value summary	**	***	ns		P value summary	*	*	ns		P value summary	**		P value summary	ns
	Significantly different? (P < 0.05)	Yes	Yes	No		Significantly different? (P < 0.05)	Yes	Yes	No		Significantly different? (P < 0.05)	Yes		Significantly different? (P < 0.05)	No
	One- or two-tailed P value?	Two-tailed	Two-tailed	Two-tailed		One- or two-tailed P value?	Two-tailed	Two-tailed	Two-tailed		One- or two-tailed P value?	Two-tailed		One- or two-tailed P value?	Two-tailed
	t, df	t=8,388 df=4	t=10,2 df=4	t=2,006 df=4		t, df	t=4,503 df=4	t=3,52 df=4	t=1,915 df=4		t, df	t=7,577 df=4		t, df	t=1,342 df=4
	How big is the difference?					How big is the difference?					How big is the difference?			How big is the difference?
	Mean ± SEM of column A	46784 ± 2229, n=3	46784 ± 2229, n=3	46784 ± 2229, n=3		Mean ± SEM of column A	1158 ± 61,89, n=3	1158 ± 61,89, n=3	1158 ± 61,89, n=3		Mean ± SEM of column E	21775 ± 1804, n=3		Mean ± SEM of column N	1137 ± 81,93, n=3
	Mean ± SEM of column B	134915 ± 10267, n=3	110399 ± 5823, n=3	59474 ± 5922, n=3		Mean ± SEM of column B	1622 ± 82,56, n=3	870,7 ± 53,1, n=3	978 ± 70,49, n=3		Mean ± SEM of column F	6682 ± 843,5, n=3		Mean ± SEM of column O	1360 ± 144,3, n=3
	Difference between means	88131 ± 10506	63615 ± 6235	12690 ± 6328		Difference between means	464,7 ± 103,2	-287 ± 81,54	-179,7 ± 93,8		Difference between means	-15093 ± 1992		Difference between means	222,7 ± 165,9
	95% confidence interval	58960 to 117301	46303 to 80927	-4878 to 30258		95% confidence interval	178,2 to 751,1	-513,4 to -60,61	-440,1 to 80,77		95% confidence interval	-20623 to -9562		95% confidence interval	-238,0 to 683,3
	R squared	0.9462	0.963	0.5014		R squared	0.8353	0.7559	0.4784		R squared	0.9349		R squared	0.3105
	F test to compare variances					F test to compare variances					F test to compare variances			F test to compare variances
	F,DFn, Dfd	21,22, 2, 2	6,825, 2, 2	7,059, 2, 2		F,DFn, Dfd	1,78, 2, 2	1,359, 2, 2	1,298, 2, 2		F,DFn, Dfd	4,577, 2, 2		F,DFn, Dfd	3,101, 2, 2
	P value	0.09	0.2556	0.2482		P value	0.7195	0.848	0.8705		P value	0.3586		P value	0.4877
	P value summary	ns	ns	ns		P value summary	ns	ns	ns		P value summary	ns		P value summary	ns
	Significantly different? (P < 0.05)	No	No	No		Significantly different? (P < 0.05)	No	No	No		Significantly different? (P < 0.05)	No		Significantly different? (P < 0.05)	No
	Fig. 2a					Fig. 2a					Fig. 2b			Fig. 2b
	RL IL6 HEK-293T	ORF6	M58R	GFP		RL IL6 A549	ORF6	M58R	GFP		RL IL10			RL IL10
	P value	0.0004	0.0072	0.5208		P value	0.0038	0.8643	0.557		P value	0.0023		P value	0.1036
	P value summary	***	**	ns		P value summary	**	ns	ns		P value summary	**		P value summary	ns
	Significantly different? (P < 0.05)	Yes	Yes	No		Significantly different? (P < 0.05)	Yes	No	No		Significantly different? (P < 0.05)	Yes		Significantly different? (P < 0.05)	No
	One- or two-tailed P value?	Two-tailed	Two-tailed	Two-tailed		One- or two-tailed P value?	Two-tailed	Two-tailed	Two-tailed		One- or two-tailed P value?	Two-tailed		One- or two-tailed P value?	Two-tailed
	t, df	t=10,79 df=4	t=5,057 df=4	t=0,7031 df=4		t, df	t=6,056 df=4	t=0,1822 df=4	t=0,6399 df=4		t, df	t=6,890 df=4		t, df	t=2,100 df=4
	How big is the difference?					How big is the difference?					How big is the difference?			How big is the difference?
	Mean ± SEM of column A	193244 ± 13386, n=3	193244 ± 13386, n=3	193244 ± 13386, n=3		Mean ± SEM of column A	15329 ± 1510, n=3	15329 ± 1510, n=3	15329 ± 1510, n=3		Mean ± SEM of column G	775354 ± 107904, n=3		Mean ± SEM of column P	11739 ± 741,7, n=3
	Mean ± SEM of column B	45315 ± 2955, n=3	633849 ± 86088, n=3	232135 ± 53674, n=3		Mean ± SEM of column B	5968 ± 333,2, n=3	15897 ± 2726, n=3	13515 ± 2399, n=3		Mean ± SEM of column H	31409 ± 3948, n=3		Mean ± SEM of column Q	9717 ± 614,1, n=3
	Difference between means	-147929 ± 13708	440606 ± 87122	38892 ± 55318		Difference between means	-9361 ± 1546	567,7 ± 3116	-1814 ± 2835		Difference between means	-743945 ± 107976		Difference between means	-2022 ± 962,9
	95% confidence interval	-185989 to -109869	198715 to 682496	-114696 to 192480		95% confidence interval	-13653 to -5069	-8083 to 9218	-9684 to 6056		95% confidence interval	-1,044e+006 to -444155		95% confidence interval	-4696 to 651,2
	R squared	0.9668	0.8648	0.11		R squared	0.9017	0.008231	0.09287		R squared	0.9223		R squared	0.5244
	F test to compare variances					F test to compare variances					F test to compare variances			F test to compare variances
	F,DFn, Dfd	20,51, 2, 2	41,36, 2, 2	16,08, 2, 2		F,DFn, Dfd	20,52, 2, 2	3,26, 2, 2	2,526, 2, 2		F,DFn, Dfd	747,1, 2, 2		F,DFn, Dfd	1,459, 2, 2
	P value	0.093	0.0472	0.1171		P value	0.0929	0.4695	0.5671		P value	0.0027		P value	0.8134
	P value summary	ns	*	ns		P value summary	ns	ns	ns		P value summary	**		P value summary	ns
	Significantly different? (P < 0.05)	No	Yes	No		Significantly different? (P < 0.05)	No	No	No		Significantly different? (P < 0.05)	Yes		Significantly different? (P < 0.05)	No

## Sheet: Fig 3
	Fig. 3a										Fig. 3c
		pIFN-kB-Luc		pSV40-RL		pIL6-kB-Luc		pSV40-RL				pIL6-Luc			pSV40-RL
		Ctr-	ORF6	Ctr-	ORF6	Ctr-	ORF6	Ctr-	ORF6			Ctr-	IKK-a	IKK-a+ORF6	Ctr-	IKK-a	IKK-a+ORF6
		75558	49929	914210	53443	275064	104302	416901	22691			70243	5982892	259250	6582992	869823	26777
		110985	58902	947458	50366	334414	136049	373223	21725			54191	4207565	453550	2024545	639255	35211
		94347	49346	711345	34079	298563	134862	320693	11345			62096	5.09523e+06	356400	4.30377e+06	754539	30994
		58967	24904	818152	58054
											Mean	62176.7	5.09523e+06	356400	4.30377e+06	754539	30994
	Mean	84964.2	45770.2	847791	48985.5	302680	125071	370272	18587		SD	8026.3	887664	97150	2.27922e+06	115284	4217
	SD	22579.1	14582.2	106209	10427.8	29888.5	17996.3	48171.8	6290.33		FOLD	1	81.9476	5.73205	1	0.175321	0.0072016
	FOLD	1	0.5387	1	0.0577801	1	0.413212	1	0.0501982			n=3	n=3	n=3	n=3	n=3	n=3
		n=4	n=4	n=4	n=4	n=3	n=3	n=3	n=3

## Sheet: Fig 3 statistic
	Fig. 3a			Fig. 3a			Fig. 3c FF pIL6
	FF pIL6-kB			FF pIFN-kB			IKKa vs. IKKa+ORF6
	P value	0.0009		P value	0.0268		P value	0.0008
	P value summary	***		P value summary	*		P value summary	***
	Significantly different? (P < 0.05)	Yes		Significantly different? (P < 0.05)	Yes		Significantly different (P < 0.05)?	Yes
	One- or two-tailed P value?	Two-tailed		One- or two-tailed P value?	Two-tailed		One- or two-tailed P value?	Two-tailed
	t, df	t=8,818 df=4		t, df	t=2,916 df=6		t, df	t=9,192 df=4
	How big is the difference?			How big is the difference?			How big is the difference?
	Mean ± SEM of column A	302680 ± 17256, n=3		Mean ± SEM of column E	84964 ± 11290, n=4		Mean ± SEM of column B	5095229 ± 512493, n=3
	Mean ± SEM of column B	125071 ± 10390, n=3		Mean ± SEM of column F	45770 ± 7291, n=4		Mean ± SEM of column C	356400 ± 56090, n=3
	Difference between means	-177609 ± 20143		Difference between means	-39194 ± 13439		Difference between means	-4738829 ± 515553
	95% confidence interval	-233534 to -121684		95% confidence interval	-72079 to -6309		95% confidence interval	-6170233 to -3307424
	R squared	0.9511		R squared	0.5864		R squared (eta squared)	0.9548
	F test to compare variances			F test to compare variances			F test to compare variances
	F,DFn, Dfd	2,758, 2, 2		F,DFn, Dfd	2,398, 3, 3		F, DFn, Dfd	83,49, 2, 2
	P value	0.5322		P value	0.4914		P value	0.0237
	P value summary	ns		P value summary	ns		P value summary	*
	Significantly different? (P < 0.05)	No		Significantly different? (P < 0.05)	No		Significantly different (P < 0.05)?	Yes
	Fig. 3a			Fig. 3a			Fig. 3c RL pIL6
	RL pIL6-kB			RL pIFN-kB			IKKa vs. IKKa+ORF6
	P value	0.0002		P value	< 0,0001		P value	0.0004
	P value summary	***		P value summary	****		P value summary	***
	Significantly different? (P < 0.05)	Yes		Significantly different? (P < 0.05)	Yes		Significantly different (P < 0.05)?	Yes
	One- or two-tailed P value?	Two-tailed		One- or two-tailed P value?	Two-tailed		One- or two-tailed P value?	Two-tailed
	t, df	t=12,54 df=4		t, df	t=14,97 df=6		t, df	t=10,86 df=4
	How big is the difference?			How big is the difference?			How big is the difference?
	Mean ± SEM of column C	370272 ± 27812, n=3		Mean ± SEM of column G	847791 ± 53104, n=4		Mean ± SEM of column E	754539 ± 66559, n=3
	Mean ± SEM of column D	18587 ± 3632, n=3		Mean ± SEM of column H	48986 ± 5214, n=4		Mean ± SEM of column F	30994 ± 2435, n=3
	Difference between means	-351685 ± 28048		Difference between means	-798806 ± 53360		Difference between means	-723545 ± 66604
	95% confidence interval	-429559 to -273811		95% confidence interval	-929372 to -668239		95% confidence interval	-908467 to -538623
	R squared	0.9752		R squared	0.9739		R squared (eta squared)	0.9672
	F test to compare variances			F test to compare variances			F test to compare variances
	F,DFn, Dfd	58,65, 2, 2		F,DFn, Dfd	103,7, 3, 3		F, DFn, Dfd	747,4, 2, 2
	P value	0.0335		P value	0.0032		P value	0.0027
	P value summary	*		P value summary	**		P value summary	**
	Significantly different? (P < 0.05)	Yes		Significantly different? (P < 0.05)	Yes		Significantly different (P < 0.05)?	Yes

## Sheet: Fig 4
		Fig. 4a						Fig. 4b
	Resveratrol		pIFN-Luc		pSV40-RL				pIL6-Luc		pSV40-RL
			Ctr-	ORF6	Ctr-	ORF6			Ctr-	ORF6	Ctr-	ORF6
			48320	19356	609207	20923			2824	1960	552108	27343
			82881.9	28270	712505	17381			2056	3585	614350	34147
			65451	23513	690756	22386			2192	2751	432581	31935
		Mean	65551	23713	670823	20230		Mean	2357.33	2765.33	533013	31141.7
		SD	17281.2	4460.36	54457.5	2573.46		SD	409.826	812.595	92376.7	3470.68
		FOLD	1	0.361749	1	0.030157		FOLD	1	1.17308	1	0.0584257
			n=3	n=3	n=3	n=3			n=3	n=3	n=3	n=3

## Sheet: Fig 4 statistic
		4				4
		FF pIFN + Res				FF pIL6 + Res
		P value	< 0,0001			P value	0.4808
		P value summary	****			P value summary	ns
		Significantly different? (P < 0.05)	Yes			Significantly different? (P < 0.05)	No
		One- or two-tailed P value?	Two-tailed			One- or two-tailed P value?	Two-tailed
		t, df	t=22,75 df=4			t, df	t=0,7765 df=4
		How big is the difference?				How big is the difference?
		Mean ± SEM of column C	1,333e+006 ± 55342, n=3			Mean ± SEM of column S	2357 ± 236,6, n=3
		Mean ± SEM of column D	59103 ± 8476, n=3			Mean ± SEM of column T	2765 ± 469,2, n=3
		Difference between means	-1,274e+006 ± 55987			Difference between means	408,0 ± 525,4
		95% confidence interval	-1,429e+006 to -1,118e+006			95% confidence interval	-1051 to 1867
		R squared	0.9923			R squared	0.131
		F test to compare variances				F test to compare variances
		F,DFn, Dfd	42,64, 2, 2			F,DFn, Dfd	3,931, 2, 2
		P value	0.0458			P value	0.4056
		P value summary	*			P value summary	ns
		Significantly different? (P < 0.05)	Yes			Significantly different? (P < 0.05)	No
		4				4
		RL pIFN + Res				RL pIL6 + Res
		P value	< 0,0001			P value	0.0007
		P value summary	****			P value summary	***
		Significantly different? (P < 0.05)	Yes			Significantly different? (P < 0.05)	Yes
		One- or two-tailed P value?	Two-tailed			One- or two-tailed P value?	Two-tailed
		t, df	t=20,67 df=4			t, df	t=9,403 df=4
		How big is the difference?				How big is the difference?
		Mean ± SEM of column G	670823 ± 31441, n=3			Mean ± SEM of column W	533013 ± 53334, n=3
		Mean ± SEM of column H	20230 ± 1486, n=3			Mean ± SEM of column X	31142 ± 2004, n=3
		Difference between means	-650593 ± 31476			Difference between means	-501871 ± 53371
		95% confidence interval	-737984 to -563201			95% confidence interval	-650054 to -353689
		R squared	0.9907			R squared	0.9567
		F test to compare variances				F test to compare variances
		F,DFn, Dfd	447,8, 2, 2			F,DFn, Dfd	708,4, 2, 2
		P value	0.0045			P value	0.0028
		P value summary	**			P value summary	**
		Significantly different? (P < 0.05)	Yes			Significantly different? (P < 0.05)	Yes

## Sheet: Fig 5
		Fig. 5a IL-6
		24h (pg/ml)				48h (pg/ml)
		Ctr-	ORF6	M58R	GFP	Ctr-	ORF6	M58R	GFP
		931	409	409	931	1781	595	1157	2045
		711	259	595	711	2004	693	1295	1295
		595	159	602	737	2157	741	1579	1855
		n=3	n=3	n=3	n=3	n=3	n=3	n=3	n=3
	MEAN	745.667	275.667	535.333	793	1980.67	676.333	1343.67	1731.67
	SD	170.661	125.831	109.464	120.216	189.083	74.4133	215.168	389.915
		Fig. 5b IFN-b
		24h (pg/ml)				48h (pg/ml)
		Ctr-	ORF6	M58R	GFP	Ctr-	ORF6	M58R	GFP
		185.094	109.993	36	204.715	330.463	189	236	365
		149	26	67	172	387	167	157	378
		192	32	38	44.9597	320	130	198	328
		n=3	n=3	n=3	n=3	n=3	n=3	n=3	n=3
	MEAN	175.365	55.9978	47	140.558	345.821	162	197	357
	SD	23.0921	46.8576	17.3494	84.3913	36.0437	29.8161	39.5095	25.9422

## Sheet: Fig 5 statistic
	Fig. 5a: IL-6 24h					Fig. 5b: IFN-b 24h
		ORF6	M58R	GFP			ORF6	M58R	GFP
	P value	0.0185	0.1468	0.7145		P value	0.0167	0.0015	0.529
	P value summary	*	ns	ns		P value summary	*	**	ns
	Significantly different? (P < 0.05)	Yes	No	No		Significantly different? (P < 0.05)	Yes	Yes	No
	One- or two-tailed P value?	Two-tailed	Two-tailed	Two-tailed		One- or two-tailed P value?	Two-tailed	Two-tailed	Two-tailed
	t, df	t=3,839 df=4	t=1,797 df=4	t=0,3927 df=4		t, df	t=3,958 df=4	t=7,7 df=4	t=0,6885 df=4
	How big is the difference?					How big is the difference?
	Mean ± SEM of column F	745,7 ± 98,53, n=3	745,7 ± 98,53, n=3	745,7 ± 98,53, n=3		Mean ± SEM of column A	175,3 ± 13,32, n=3	175,3 ± 13,32, n=3	175,3 ± 13,32, n=3
	Mean ± SEM of column G	275,7 ± 72,65, n=3	535,3 ± 63,2, n=3	793 ± 69,41, n=3		Mean ± SEM of column B	56 ± 27,05, n=3	47 ± 10,02, n=3	140,6 ± 48,72, n=3
	Difference between means	-470 ± 122,4	-210,3 ± 117,1	47,33 ± 120,5		Difference between means	-119,3 ± 30,15	-128,3 ± 16,67	-34,78 ± 50,51
	95% confidence interval	-809,9 to -130,1	-535,3 to 114,7	-287,3 to 382		95% confidence interval	-203,1 to -35,62	-174,6 to -82,06	-175 to 105,5
	R squared	0.7866	0.4466	0.03713		R squared	0.7966	0.9368	0.1059
	F test to compare variances					F test to compare variances
	F,DFn, Dfd	1,839, 2, 2	2,431, 2, 2	2,015, 2, 2		F,DFn, Dfd	4,124, 2, 2	1,769, 2, 2	13,38, 2, 2
	P value	0.7044	0.583	0.6633		P value	0.3903	0.7224	0.1391
	P value summary	ns	ns	ns		P value summary	ns	ns	ns
	Significantly different? (P < 0.05)	No	No	No		Significantly different? (P < 0.05)	No	No	No
	Fig. 5a: IL-6 48h					Fig. 5b: IFN-b 48h
		ORF6	M58R	GFP			ORF6	M58R	GFP
	P value	0.0004	0.0183	0.3759		P value	0.0024	0.0085	0.6853
	P value summary	***	*	ns		P value summary	**	**	ns
	Significantly different? (P < 0.05)	Yes	Yes	No		Significantly different? (P < 0.05)	Yes	Yes	No
	One- or two-tailed P value?	Two-tailed	Two-tailed	Two-tailed		One- or two-tailed P value?	Two-tailed	Two-tailed	Two-tailed
	t, df	t=11,12 df=4	t=3,852 df=4	t=0,9952 df=4		t, df	t=6,806 df=4	t=4,82 df=4	t=0,436 df=4
	How big is the difference?					How big is the difference?
	Mean ± SEM of column H	1981 ± 109,2, n=3	1981 ± 109,2, n=3	1981 ± 109,2, n=3		Mean ± SEM of column C	345,8 ± 20,81, n=3	345,8 ± 20,81, n=3	345,8 ± 20,81, n=3
	Mean ± SEM of column I	676,3 ± 42,96, n=3	1344 ± 124,2, n=3	1732 ± 225,1, n=3		Mean ± SEM of column D	162 ± 17,21, n=3	197 ± 22,81, n=3	357 ± 14,98, n=3
	Difference between means	-1304 ± 117,3	-637 ± 165,4	-249 ± 250,2		Difference between means	-183,8 ± 27,01	-148,8 ± 30,88	11,18 ± 25,64
	95% confidence interval	-1630 to -978,6	-1096 to -177,8	-943,6 to 445,6		95% confidence interval	-258,8 to -108,8	-234,5 to -63,09	-60,01 to 82,37
	R squared	0.9687	0.7876	0.1985		R squared	0.9205	0.8531	0.04537
	F test to compare variances					F test to compare variances
	F,DFn, Dfd	6,457, 2, 2	1,295, 2, 2	4,252, 2, 2		F,DFn, Dfd	1,461, 2, 2	1,202, 2, 2	1,93, 2, 2
	P value	0.2682	0.8715	0.3808		P value	0.8126	0.9084	0.6825
	P value summary	ns	ns	ns		P value summary	ns	ns	ns
	Significantly different? (P < 0.05)	No	No	No		Significantly different? (P < 0.05)	No	No	No

[truncated: 2 more sheets: Fig 6, Fig 6 statistic]
